1 **Increased low-frequency brain responses to music after psilocybin therapy**  
2 **for depression**

3 Matthew B. Wall<sup>1,2,3</sup>, Cynthia Lam<sup>4,5</sup>, Natalie Ertl<sup>1,2</sup>, Mendel Kaelen<sup>6</sup>, Leor Roseman<sup>6</sup>, David  
4 J. Nutt<sup>6</sup>, and Robin L. Carhart-Harris<sup>6,7</sup>.

5 <sup>1</sup>Invicro London, Hammersmith Hospital, UK

6 <sup>2</sup>Department of Metabolism, Digestion and Reproduction, Faculty of Medicine, Imperial  
7 College London, UK

8 <sup>3</sup>Clinical Psychopharmacology Unit, University College London, UK

9 <sup>4</sup>Division of Brain Sciences, Faculty of Medicine, Imperial College London

10 <sup>5</sup>Department of Clinical Neurosciences, University of Cambridge

11 <sup>6</sup>Centre for Psychedelic Research, Imperial College London, UK

12 <sup>7</sup>Psychedelics Division - Neuroscape, University of California San Francisco, USA.

13

14 Corresponding Author:  
15 Matthew B. Wall  
16 [matt.wall@invicro.co.uk](mailto:matt.wall@invicro.co.uk)

17

18 **Funding and Disclosures**

19 This research was supported by a Medical Research Council UK Clinical Development  
20 Pathway Funding Scheme (DPFS). RCH was supported by the Alex Mosley Charitable Trust  
21 and now a Ralph Metzner endowment. DJN is supported by the Safra Foundation (DJN is the  
22 Edmond J. Safra Professor of Neuropsychopharmacology). This report presents independent  
23 research, part of which was carried out at the Imperial Clinical Research Facility and Invicro  
24 London. MBW and NE's primary employer is Invicro LLC., a contract research organization  
25 which provides services to the pharmaceutical and biotechnology industries. All other authors  
26 report no other relevant disclosures.

27

28 **Abstract**

29 Psychedelic-assisted psychotherapy with psilocybin is an emerging therapy with great  
30 promise for depression, and modern psychedelic therapy (PT) methods incorporate music as a  
31 key element. Music is an effective emotional/hedonic stimulus that could also be useful in  
32 assessing changes in emotional responsiveness following psychedelic therapy. Brain  
33 responses to music were assessed before and after PT using functional Magnetic Resonance  
34 Imaging (fMRI) and ALFF (Amplitude of Low Frequency Fluctuations) analysis methods.  
35 Nineteen patients with treatment-resistant depression underwent two treatment sessions  
36 involving administration of psilocybin, with MRI data acquired one week prior and the day  
37 after completion of the second of two psilocybin dosing sessions. Comparison of music-  
38 listening and resting-state scans revealed significantly greater ALFF in bilateral superior  
39 temporal cortex for the post-treatment music scan, and in the right ventral occipital lobe for  
40 the post-treatment resting-state scan. ROI analyses of these clusters revealed a significant  
41 effect of treatment in the superior temporal lobe for the music scan only. Somewhat  
42 consistently, voxelwise comparison of treatment effects showed relative increases for the  
43 music scan in the bilateral superior temporal lobes and supramarginal gyrus, and relative  
44 decreases in the medial frontal lobes for the resting-state scan. ALFF in these music-related  
45 clusters was significantly correlated with intensity of subjective effects felt during the dosing  
46 sessions. These data suggest a specific effect of PT on the brain's response to a hedonic  
47 stimulus (music), implying an elevated responsiveness to music after psilocybin therapy that  
48 was related to subjective drug effects felt during dosing.

## 49 **Introduction**

50 The use of psychotropic compounds for medicinal, spiritual, and recreational purposes has  
51 ancient origins in a diverse set of human cultures, and likely stretches back into pre-history  
52 (Hardy, 2021). A recent revival of interest in the clinical potential of these compounds has  
53 found that classic psychedelics such as psilocybin may have utility in the treatment of  
54 depression (Carhart-Harris et al., 2021; Carhart-Harris et al., 2016), addiction (Johnson,  
55 Garcia-Romeu, Cosimano, & Griffiths, 2014), and anxiety (Grob et al., 2011). Modern  
56 neuroscientific research is beginning to understand the potential physiological and  
57 psychopharmacological mechanisms behind these therapeutic effects (Carhart-Harris et al.,  
58 2017; Mertens et al., 2020).

59 Music is also pervasively, and perhaps universally, enjoyed across cultures and throughout  
60 human history (Cross, 2001), and has deep biological and evolutionary foundations (Fitch,  
61 2006). The use of music in a therapeutic context dates back to at least Pythagoras (Nilsson,  
62 2008) and also features in the ancient Indian medical system of Ayurveda (Sundar, 2007).  
63 Modern research has started to identify the neurological underpinnings of the unique role that  
64 music plays in human cultural and emotional life (Reybrouck, Vuust, & Brattico, 2018) and  
65 its potential clinical use (Bower, Magee, Catroppa, & Baker, 2021; Nilsson, 2008). The  
66 brain's reward system, which includes the ventral striatum and ventro-medial pre-frontal  
67 cortex (vmPFC), appears to be implicated in pleasurable emotional responses to music  
68 (Koelsch, 2020). The primary auditory cortex (superior temporal gyrus, Heschl's gyrus) is  
69 another relevant system for music perception (Koelsch, Skouras, & Lohmann, 2018) and  
70 limbic brain regions have also been implicated in emotional responses to music (Koelsch &  
71 Skouras, 2014). Music can evoke a range of emotions but generally can be considered a  
72 hedonic stimulus, capable of evoking positively valenced emotions. It is therefore a  
73 potentially useful tool for indexing anhedonia, i.e. the relative inability to experience  
74 pleasure; a common symptom of depression (Cao et al., 2019). Previous studies have shown  
75 decreased responses to music in the neural reward system in depressed patients (Jenkins et  
76 al., 2018; Osuch et al., 2009).

77 Recent research on the effect of psychotropic drugs on music perception has shown that  
78 classic psychedelics, like LSD, can enhance the subjective emotional response to music  
79 (Kaelen et al., 2015), and that brain responses to music are also significantly increased  
80 (Kaelen et al., 2017). The hippocampus has been identified as a key region involved in both

81 the effects of LSD and music, alone, and in combination (Kaelen et al., 2016). Music plays a  
82 central role in modern and historic versions of psychedelic therapy, useful both for its  
83 calming effects at various stages of the therapeutic process, and for its ability to act  
84 synergistically with the drug to guide and potentially enhance emotional experiences and  
85 evoke autobiographical memories (Barrett, Preller, & Kaelen, 2018; Kaelen et al., 2016).

86 The aim of the present study was to examine the effects of psychedelic therapy for depression  
87 on the brain's response to music using functional Magnetic Resonance Imaging (fMRI),  
88 comparing a music-listening scan to a resting-state scan, before and after treatment. To do so,  
89 we used a measure of the brain's Low-Frequency Oscillations (LFOs) known as ALFF  
90 (Amplitude of Low-Frequency Fluctuations; Zang et al., 2007). ALFF is a spatially  
91 unconstrained analysis method that is well-suited for characterizing both resting-state and  
92 stimulus-related brain activity and has high test-retest reliability (Li, Kadivar, Pluta, Dunlop,  
93 & Wang, 2012). We also investigated the relationship between the derived ALFF results and  
94 subjective clinical/psychometric results obtained during and after the therapy sessions.

## 95 **Methods**

96 This study was approved by the National Research Ethics Service (NRES) committee (West  
97 London) and was conducted in accordance with the revised declaration of Helsinki (2000),  
98 Good Clinical Practice (GCP) guidelines, and the National Health Service (NHS) Research  
99 Governance Framework. Imperial College London sponsored the research which was  
100 conducted under a Home Office license for research with schedule 1 drugs, and the  
101 Medicines and Healthcare products Regulatory Agency (MHRA) also approved the study.  
102 All patients gave written informed consent. The study used facilities at the Imperial College  
103 Clinical Research Facility, and Invicro London.

104 The resting-state data used in this work has been previously analysed and reported (Carhart-  
105 Harris et al., 2017) but not using an ALFF analysis. The presently reported results therefore  
106 derive from a novel analysis of the resting-state data, combined with the music-listening data  
107 from the same subjects. The music-listening fMRI data has not been previously reported.

### 108 *Participants and Recruitment*

109 Nineteen subjects were recruited and completed the study, including thirteen males and six  
110 females, aged between 27-64. The mean age of participants was 41.3 (SD=10.5), and all had  
111 diagnoses of treatment resistant major depression. Initial screening included physical health  
112 assessments (electrocardiogram, blood and urine tests), a psychiatric interview, an assessment  
113 by a qualified clinician, and self-report questionnaires. The key inclusion criteria were a  
114 diagnosis of moderate to severe depression, with a score of 17 or higher on the 21-item  
115 Hamilton Depression Rating Scale (HAM-D), and treatment-resistance, meaning that they  
116 had been non-responsive to at least two previous pharmacological treatments. Exclusion  
117 criteria included previous or current psychotic disorders, individuals with a history of  
118 psychotic disorders in their immediate family members, previous suicide attempts that led to  
119 hospitalization, pregnancy, drug or alcohol dependence, phobia of blood or needles, history  
120 of mania, other concurrent medications, and general contraindications for MRI scanning.

121 *Design and Procedure*

122 For full details of the study procedure please see the original report of the clinical data  
123 (Carhart-Harris et al., 2016). The study was an open-label design with no control group or  
124 placebo, and all subjects received the active intervention with full prior disclosure. The  
125 psilocybin used in the study was obtained from THC-pharm (Frankfurt, Germany), and  
126 processed into size 0 capsules with 5 mg psilocybin each, by Guy's and St Thomas'  
127 Hospitals' Pharmacy Manufacturing Unit (London, UK).

128 Psilocybin was administered to the participants in two therapy sessions: low dose (10mg) in  
129 the first session and high dose (25mg) in the second session one week later. Post capsule  
130 ingestion, patients lay with eyes closed while listening to music. Two therapists were always  
131 present, and adopted a non-directive, supportive approach for the duration of the sessions.

132 MRI scanning visits were conducted one week prior to the first therapy/dosing visit, and the  
133 day after the second therapy/dosing session. The primary clinical outcome was the Quick  
134 Inventory of Depressive Symptoms (Rush et al., 2003) and this was administered at baseline,  
135 weekly from week one to week five, and finally at a three-month follow-up. Other  
136 questionnaire measures included the 5D-ASC (5-dimension altered states of consciousness  
137 questionnaire; administered 6-7 hours post-dosing, at each dosing session; Dittrich, 1998) and  
138 the GEMS-3 (Geneva Emotional Music Scale; Zentner, Grandjean, & Scherer, 2008), which  
139 was administered immediately after each MRI scanning session in order to assess the  
140 subjective response to the music-listening scan. For full details of all questionnaire measures  
141 see Carhart-Harris et al. (2016).

142

143 *Stimuli and Image Acquisition*

144 Subjects were instructed to keep their eyes closed for the duration of the resting-state and  
145 music scans. A prompt with these instructions was displayed on the screen during the scan as  
146 a reminder in case they opened their eyes at any point.

147 Music stimuli used in this study were edited compositions by Carlos Cipa. A different music  
148 track was played on each scan visit, and the order of the playlist was randomized across  
149 subjects. 'Lost and Delirious' and 'Lie with Me' were combined in the first track; and 'Wide

150 and Moving' and 'The Dream' were combined in the second track. All tracks used were solo  
151 piano works, with no vocals or other instruments. The tracks were chosen in order to balance  
152 emotional potency, based on ratings by an independent sample. Ableton Live 9 software was  
153 used to boost the volume and apply audio compression in order to provide maximally-audible  
154 stimuli that could be easily heard over the background noise of the scanner. Music was  
155 played through MRI-compatible headphones (MR Confon) during the scan.

156 Imaging was performed on a 3T Siemens Tim Trio using a 12-channel head coil at Invicro,  
157 London, UK. Anatomical images were acquired using the ADNI-GO (Jack et al., 2008)  
158 recommended MPRAGE parameters: TE 2.98ms, 160 sagittal slices, 256?256 in-plane FOV,  
159 flip MPRAGE parameters (1mm isotropic voxels, TR=2300ms, flip angle = 9°, bandwidth =  
160 240Hz/pixel, GRAPPA = 2).

161 T2\*-weighted echo-planar images (EPI) for BOLD contrast were acquired for the functional  
162 scans (3 mm isotropic voxels, TR = 2000 ms, TE = 31 ms, 36 axial slices, 192 mm in-plane  
163 FOV, flip angle = 80°, bandwidth = 2298 Hz/pixel, GRAPPA = 2). Both the resting and  
164 music scans were 240 volumes or exactly eight minutes in duration. Data from other scan  
165 sequences was also collected during each session, and these have been reported previously  
166 elsewhere (Carhart-Harris et al., 2017; Mertens et al., 2020; Roseman, Demetriou, Wall,  
167 Nutt, & Carhart-Harris, 2018).

#### 168 *Data Analysis*

169 All analyses were performed using the FMRIB Software Library (FSL; v.6.03) and Analysis  
170 of Functional NeuroImages (AFNI) software. Anatomical data were processed using the  
171 `fsl_anat` script which involved skull-stripping and segmentation into White Matter (WM) and  
172 Cerebrospinal Fluid (CSF) masks with FMRIB's Automated Segmentation Tool (FAST).  
173 These anatomical masks were registered to each subject's functional space, and time-series  
174 from the pre-processed (see below) functional data were extracted to be used for later  
175 analysis.

176 Pre-processing of the functional data used FSL's FEAT module and included head-motion  
177 correction, spatial smoothing with a 6mm Gaussian filter, pre-whitening and correction of  
178 auto-correlation of the time-series with FSL's FILM algorithm, and registration to standard  
179 (MNI152) space. FEAT analysis models included the CSF and WM time-series, and six  
180 head-motion parameters (three translations, and three rotations) as regressors (Wolletz et al.,

181 2019). The purpose of these first-level analysis models was to de-noise the data by regressing  
182 out these eight time-series, and all subsequent analyses therefore used the residuals images  
183 produced by FEAT. These images were transformed into standard (MNI152) space using the  
184 parameters also derived by FEAT. The ALFF analyses were then performed on each  
185 individual subject's pre-processed, de-noised, standard-space data using the AFNI 3dRSFC  
186 script. The data were band-pass filtered using a range of 0.01-0.1Hz in these analyses.

187 The resulting ALFF images were then combined in group-level analyses using FSL's  
188 Ordinary Least Squares (OLS) mixed effects model. Results were thresholded at  $Z = 2.3$ ,  $p <$   
189  $0.05$  (cluster-corrected for multiple comparisons). A single group mean average model (all  
190 subjects, all scans) was used to observe the overall spatial distribution of LFOs and to  
191 validate the methods. A separate group-level model was used to examine the main effect of  
192 the task (i.e. the difference between all music-listening scans, and all resting-scans). Further  
193 separate group-level models were used to compare the effect of the drug treatment/therapy  
194 within each scan type (i.e. after vs. before therapy for the rest scans, and after vs. before  
195 therapy for the music scans).

196 Following the recommendations of (Friston, Rotshtein, Geng, Sterzer, & Henson, 2006) and  
197 similar procedures used in (Yang et al., 2020) we defined functional Regions of Interest  
198 (ROIs) for further investigation. The first set of ROIs was defined from clusters identified in  
199 the main task effect analysis (music vs. resting scans). These were used to investigate the  
200 effect of psilocybin therapy in the clusters which showed a significant task-dependent  
201 difference. The second set of ROIs was defined from clusters resulting from the specific  
202 comparisons of before vs. after psilocybin therapy, in each functional task scan. These were  
203 used to assess relationships (using Pearson's correlations) with appropriate psychometric  
204 measures: the 5D-ASC, the GEMS-3, and the QIDS questionnaires. All ROI data were Z-  
205 normalised before further analysis.



## 206 Results

207 The mean (all subjects, all scans) analysis of the ALFF measure showed a regional  
208 distribution of values similar to what is typically observed in ALFF studies (e.g. Zou et al.,  
209 2008). High values were observed in ventral brain regions (likely attributable to physiological  
210 noise) but also in the cingulate cortex, medial and lateral frontal lobes, and insula (see  
211 supplementary figure S1).

212 Comparison of mean effects of scan type (all resting-state scans vs. all music-listening scans  
213 contrasted but pre vs post treatment collapsed into one) showed relatively higher ALFF  
214 values in the bilateral superior temporal gyrus (primary auditory cortex) for the music-  
215 listening scan, and a relatively higher response in the lingual gyrus for the resting-state scan.

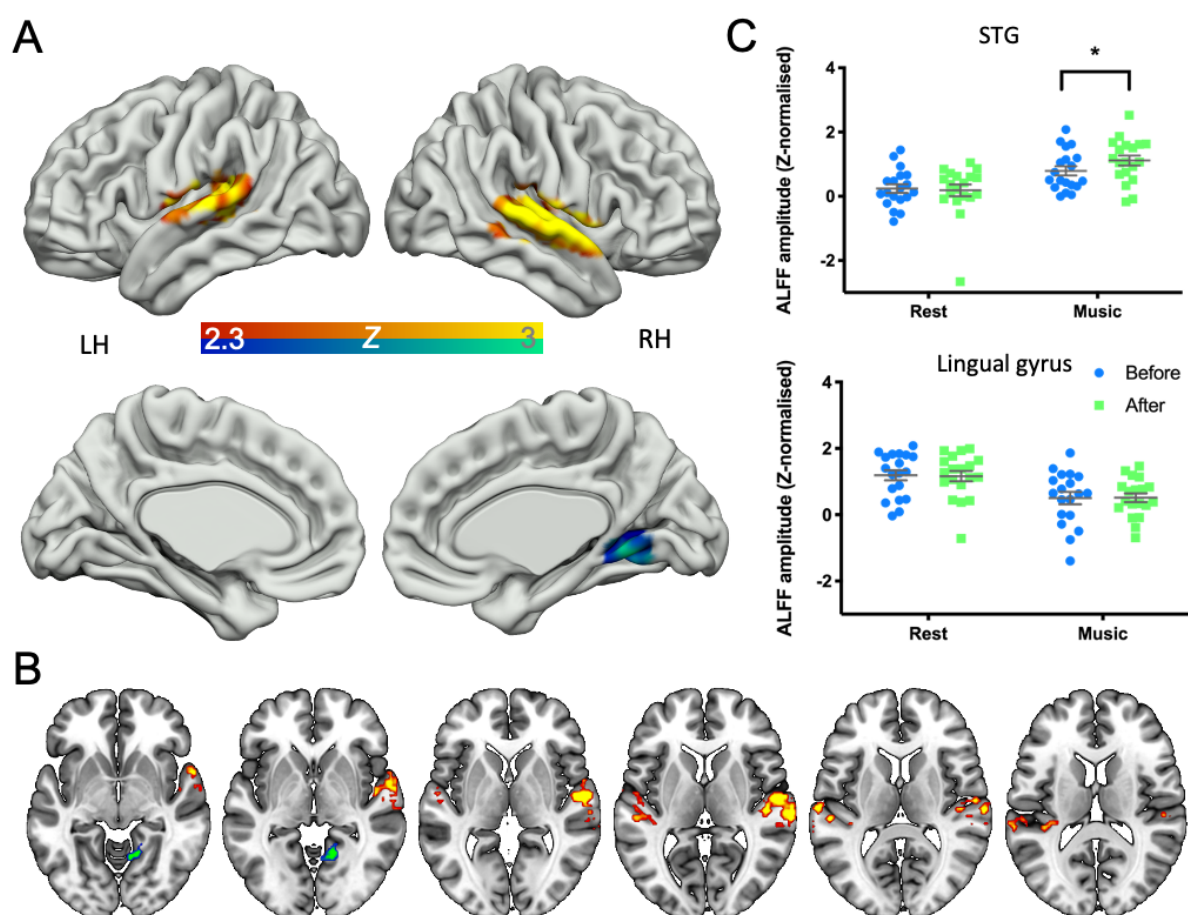

216

217 Figure 1. A: Comparison of the two scan types (resting-state or 'rest' vs. music), with  
218 pre and post treatment collapsed (panel A = 3D render, B = axial slices). The red-  
219 yellow colour-scale denotes greater responses in the music-listening (vs rest), and the  
220 blue-green colour-scale denotes greater responses in the resting scan (vs music). Panel

221 C: ROI data from the two task-defined ROIs. Significant effect of treatment in the  
222 music/superior temporal gyrus (STG) ROI, for the music scan ( $p=0.045$ ). Clear main  
223 effects of scan type (rest vs. music) are also evident here in both regions because  
224 these ROIs were selected on that basis.

225 These two regions were defined as ROIs and the effects of treatment (before vs. after  
226 psychedelic therapy) and scan type (rest vs. music) were examined using 2x2 ANOVA  
227 models. For the lingual gyrus region, there was only a main effect of scan type ( $F[1,18] =$   
228  $38.45, p < 0.001$ ), which is expected as the ROIs were selected on the basis of differential  
229 response to the two scans. In the superior temporal gyrus region, there was likewise a scan  
230 type main effect ( $F[1,18] = 32.89, p < 0.001$ ) but also a significant interaction with treatment  
231 ( $F[1,18] = 4.90, p = 0.04$ ). Post-hoc tests revealed the source of this interaction to be a  
232 significant increase in responses in this region *after* psilocybin therapy, but only for the  
233 music-listening scan ( $t[31] = 2.09, p = 0.045$ ). See histograms on figure 1. This suggests a  
234 specific effect of increased LFOs in the superior temporal lobe after the therapy when  
235 listening to music. There was no effect of the therapy on the resting state scan in this superior  
236 temporal lobe region, and no effects of the therapy in the lingual gyrus region (in either scan  
237 type). Additional analyses examined potential differences between the two music tracks and  
238 the effectiveness of the counterbalancing. An additional between-subjects factor of track  
239 order was also included (i.e., subjects who received track A on visit 1, vs. subjects who  
240 received track B on visit 1). These analyses showed no main effects of track order and no  
241 significant interactions with the other factors (all  $p$  values  $> 0.1$ ) in either of the ROIs.

242 Voxelwise comparisons of the resting-state data before vs. after treatment within each scan  
243 type (figure 2) showed an effect in the medial frontal lobe (before  $>$  after), suggesting  
244 decreased ALFF in these regions after the therapy. We also see relative increases in ALFF  
245 (after  $>$  before) in the music scan, in a lateral region covering the superior temporal areas and  
246 the supramarginal gyrus in the left hemisphere, and a similar, though somewhat smaller and  
247 more anterior region in the right hemisphere, centred on the inferior portion of the precentral  
248 gyrus. An additional small cluster in the left lingual gyrus is also present in this comparison.

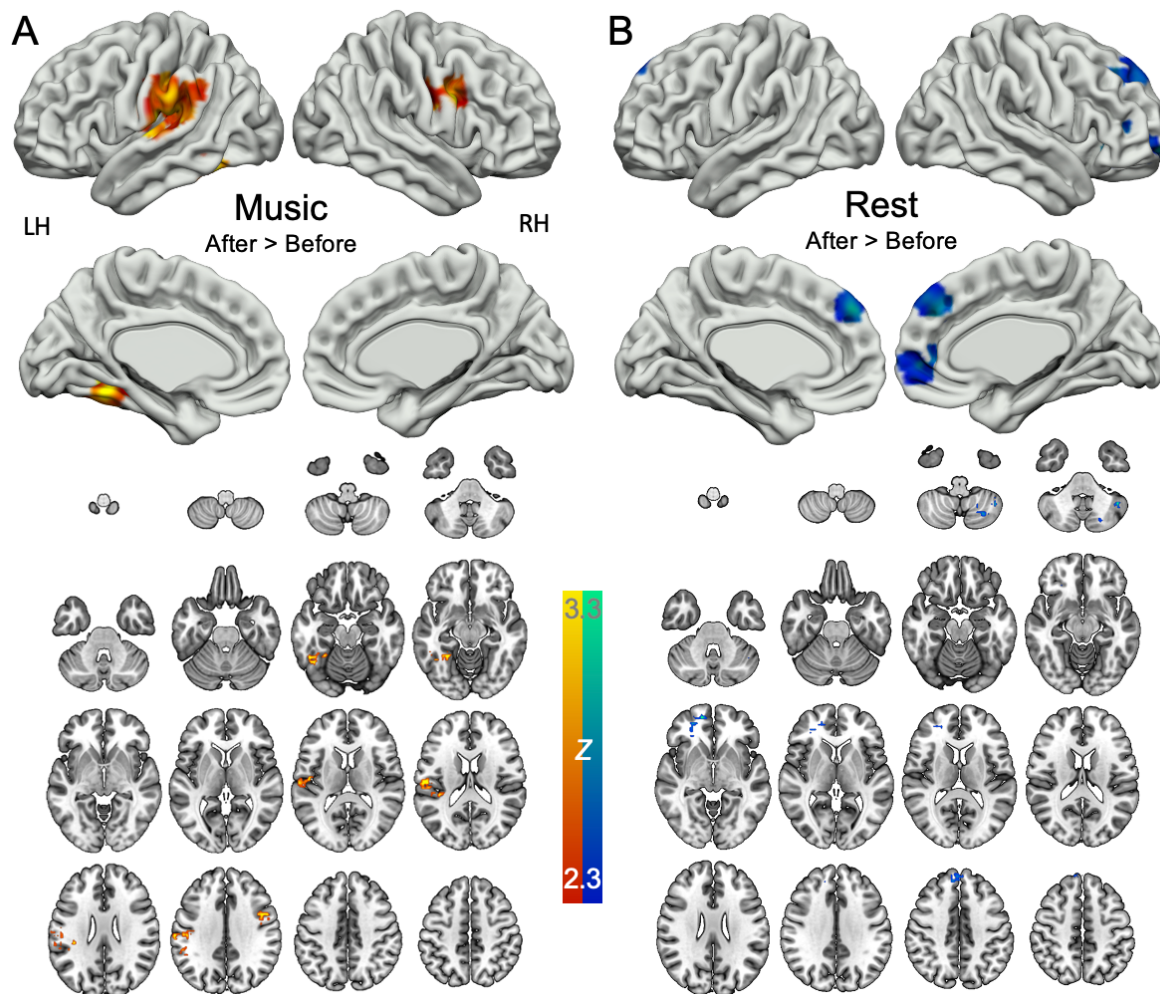

249

250 Figure 2. Comparison of pre- and post-therapy effects (after > before) for each scan  
251 individually (A = music; B = resting). The red-yellow colour-scale denotes increased  
252 responses post-therapy and the blue-green colour-scale denotes decreased responses  
253 post-therapy. ALFF values during the music scan were higher post-therapy with  
254 significant clusters observed in the supramarginal gyrus, extending down into the  
255 superior temporal lobe (left hemisphere), the inferior portion of the pre-central gyrus  
256 (right hemisphere), and a small cluster in the left lingual gyrus. In the resting-state  
257 scan, ALFF values were reduced post-therapy in the medial frontal lobe.

258 These activation clusters were also defined as ROIs and the delta (change in response  
259 between pre- and post-therapy scans: after minus before) was calculated on data from these  
260 ROIs. Performing correlations on these measures with clinical and psychometric scores  
261 showed that the change in response to music in the post-therapy scan was significantly  
262 correlated with several sub-scales of the ASC scale acquired on the second (high-dose)  
263 treatment visit (figure 3). The DED (ego-dissolution), VRS (visionary restructuralization),

264 AUA (auditory alterations) and VIR (vigilance reduction) sub-scales showed significant  
265 relationships, while the OCEAN (oceanic boundlessness) sub-scale was non-significant. The  
266 mean of all five sub-scales was also highly correlated with the ROI data ( $r = 0.621, p =$   
267  $0.005$ ). The mean of all sub-scales and the result from the VIR sub-scale ( $r = 0.613, p =$   
268  $0.005$ ) survive family-wise correction for multiple comparisons with a corrected alpha level  
269 of  $p = 0.008$ . There were no other relationships between the music scan data and any other  
270 subjective questionnaire measure or clinical rating scale, and similar analyses with the rest  
271 scan data also showed no significant relationships with any of the questionnaire measures.  
272 See the supplementary material for full tables of correlation results.

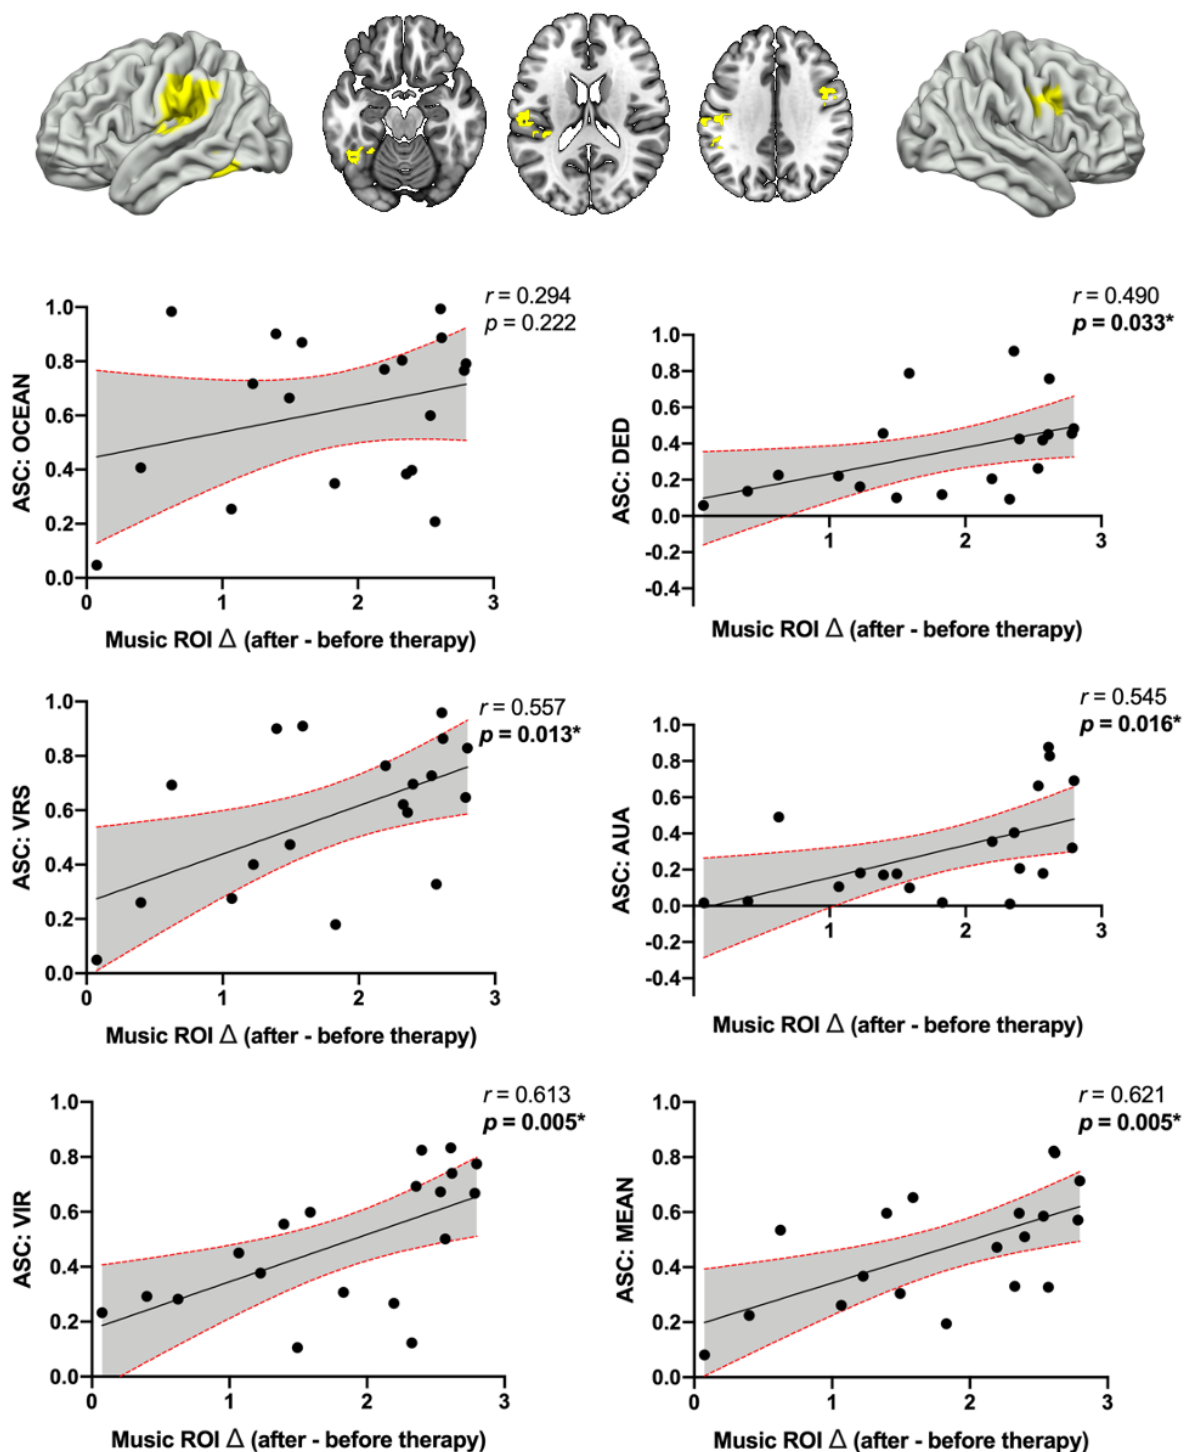

273

274

275

276

277

278

279

Figure 3. Exploratory correlational analyses between increased ALFF during music after therapy vs before (ROI: top row) and the five-dimensional altered states of consciousness sub-scales. OCEAN = “Oceanic boundlessness”; DED = “Ego-dissolution”; VRS = “Visionary restructuring”; AUA = “Auditory alterations”; VIR = “Vigilance reduction”. MEAN = Mean of all five sub-scales (also known as the ‘global’ ASC score). Significant correlations ( $p < 0.05$ ) are highlighted with bold

280 text and \*. The VIR and mean/global scores (bottom two panels) survive a family-  
281 wise corrected  $p$  value threshold of 0.008.



## 282 Discussion

283 ALFF identified brain regions in the superior temporal lobe in which low-frequency  
284 fluctuations were greater during music listening compared with (no-music) resting-state  
285 conditions (figure 1) and these regions showed significantly greater increase in ALFF after  
286 psilocybin therapy versus before (figure 1 histograms; panel C). Examining the effects of the  
287 psychedelic therapy on each scan type separately revealed lower ALFF in the medial frontal  
288 lobe for the resting-state scan after therapy versus before, and increased ALFF in the superior  
289 temporal lobe regions and supramarginal gyrus for the music scan after versus before  
290 therapy. Patients therefore had higher responses in recognized music and musical emotion-  
291 processing brain regions (Koelsch et al., 2018) after the therapy. Furthermore, this increased  
292 ALFF-indexed responsiveness to music was mediated by the subjective quality of the  
293 psychedelic experience in the therapy session, with the increases in ALFF being significantly  
294 correlated with higher levels of (anxious) ego-dissolution, visionary restructuralization,  
295 auditory alterations, and vigilance reduction as well as an averaged total or ‘global’ score, all  
296 measured by the 5D-ASC questionnaire (Dittrich, 1998; Hasler, Grimberg, Benz, Huber, &  
297 Vollenweider, 2004). This suggests a potential causal effect of the drug experience in  
298 producing the effects.

299 The finding that music-listening (compared with rest) produces increased LFOs in the  
300 superior temporal region (Heschl’s gyrus, and the planum temporale) is unsurprising, as these  
301 regions belong to the primary auditory cortex, and are highly specialized for sound  
302 perception, including music. What is perhaps more interesting is that responses in these  
303 regions were also significantly affected by the therapy in these patients, given that most  
304 previous work on musical aesthetics and emotionality has tended to identify reward/limbic  
305 regions as being of greater importance for these features (Brown, Gao, Tisdelle, Eickhoff, &  
306 Liotti, 2011; Koelsch, 2020; Koelsch & Skouras, 2014; Menon & Levitin, 2005). However,  
307 recent work has also strongly made the case that the auditory cortex plays a role in the  
308 processing of affective auditory information, and has functional connections with limbic and  
309 paralimbic structures (Koelsch et al., 2018). A recent meta-analysis (N=47 studies) has also  
310 identified Heschl’s gyrus as being specifically involved in music-evoked emotions, as well as  
311 a range of other limbic and reward regions (Koelsch, 2020). These results therefore provide  
312 additional convergent evidence that the therapeutic effect of psilocybin is (at least, partly)  
313 mediated by the qualities of the acute psychedelic experience, including ‘emotional

314 breakthroughs' which are a key mediator of longer-term psychological effects, including  
315 improvements in mental health outcomes (Roseman et al., 2019). Previous work on this  
316 cohort of patients is also supportive of this interpretation, showing that changes in the  
317 functional connectivity of emotion/reward regions - such as the vmPFC - are meaningfully  
318 related to longer-term clinical effects (Carhart-Harris et al., 2017) and that brain responses to  
319 emotional face stimuli one day post-treatment show clear increases after the therapy  
320 (Roseman et al., 2018), with additional effects on brain connectivity (Mertens et al., 2020);  
321 although see Barrett, Doss, Sepeda, Pekar, & Griffiths (2020) for contrasting results after a  
322 longer period post-dose. Taken together, it is tempting to infer a greater sensitivity or  
323 responsivity to emotional stimuli in complex emotional processing systems post psilocybin  
324 therapy; consistent with findings that emotional responsiveness is enhanced post psilocybin  
325 therapy (Carhart-Harris et al., 2021).

326 The present study's results also further validate the use of music as an experimental probe  
327 stimulus in studies of depression and build upon previous work in this area (e.g. Jenkins *et*  
328 *al.*, 2018). The approach used here of a single continuous piece of music contrasted with a  
329 resting-state scan is relatively uncommon but provides a novel and rich dataset which can be  
330 interrogated with a number of different analysis approaches (Cong et al., 2014). The analysis  
331 of LFOs presented here would likely not be possible with a more conventional fMRI design  
332 (e.g. relatively short blocks of music separated by silence or non-musical sound). Use of  
333 continuous 'naturalistic' stimuli in fMRI is becoming more common (Breakspear & Chang,  
334 2020; Maguire, 2012; Sonkusare, Breakspear, & Guo, 2019), with recent results showing that  
335 it may have higher test-retest reliability than standard methods (Wang et al., 2017), be more  
336 accurately predictive of behavioural phenotypes (Finn & Bandettini, 2021), and have the  
337 advantage of superior ecological validity versus e.g., short blocks of music.

338 The post-therapy changes seen in the resting-state scan in the medial frontal lobe are also  
339 consistent with previous work showing abnormal medial frontal lobe functioning in  
340 depression (Lemogne, Delaveau, Freton, Guionnet, & Fossati, 2012; Lemogne et al., 2009;  
341 Nejad, Fossati, & Lemogne, 2013). The medial PFC has also been implicated in the acute  
342 brain action of psychedelics (Carhart-Harris et al., 2012, 2015). Previous work using ALFF  
343 methods has identified frontal lobe abnormalities in major depression (Rosenbaum et al.,  
344 2020) and in depressed Parkinson's disease patients (Wen, Wu, Liu, Li, & Yao, 2013). The  
345 medial frontal lobe has been implicated in the action of selective serotonin re-uptake



346 inhibitors (SSRI) treatment (Di Simplicio, Norbury, & Harmer, 2012; Godlewska, Browning,  
347 Norbury, Cowen, & Harmer, 2016; Ma, 2015). Recent work has also shown reductions in  
348 medial-frontal connectivity with the amygdala, following psychedelic therapy (Mertens et al.,  
349 2020) as well as decreased mPFC-posterior cingulate cortex functional connectivity under  
350 psilocybin (Carhart-Harris et al., 2012) but increased mPFC-parietal lobule connectivity after  
351 psilocybin therapy for depression (Carhart-Harris et al., 2017). Taken together, these findings  
352 converge on medial PFC dysfunction in depression being a key target for psilocybin therapy.

353 Limitations of this study largely relate to its design as an open-label trial with a limited  
354 number of subjects and lack of placebo control; these issues will require further trials to  
355 adequately address. In the mean ALFF data (see supplementary material) the pattern of high  
356 values around the base of the brain where there are many large blood vessels, does suggest a  
357 substantial physiological (cardiac, respiratory) component in the signal, despite the de-  
358 noising procedures used. However, the experimental design used here effectively controls for  
359 these effects, with within-subjects comparisons used for both cross-session and within-  
360 session contrasts between the resting and music scans. ALFF measures have high reliability  
361 (Li et al., 2012), with physiological effects also showing high temporal stability (Küblböck et  
362 al., 2014) and are therefore effectively subtracted out by the within-subjects design. The  
363 specificity of the results of contrasts between resting and music scans (figure 1), which  
364 specifically highlight the auditory cortex, suggest that this is the case. The related measure  
365 fALFF (fractional ALFF; Zou *et al.*, 2008) is somewhat less influenced by physiological  
366 effects, but also has significantly lower test-retest reliability (Zuo & Xing, 2014), making it a  
367 less suitable measure in this study, which relies on cross-session comparisons.

368 In summary, this study's results suggest that naturalistic music-listening, as well as being a  
369 crucial part of the therapy itself (Barrett et al., 2018), is also a potentially useful method for  
370 investigating treatment effects in psychedelic-therapy research. Patients in this study showed  
371 an enhanced response to music-listening the day after the therapy, as indexed by increased  
372 ALFF, and this enhanced response was related to the intensity of the subjective effects felt  
373 during the acute psychedelic experience on the high-dose therapy visit. Future work may  
374 examine the effects of music with a longer gap separating the last dosing and the post  
375 treatment scan, as there are some reasons to believe that different brain changes can be seen  
376 one day post-treatment versus after a longer post-treatment period. Nevertheless, these data  
377 provide an initial indication of the effects of psychedelic therapy for depression on brain

378 responses to music that will help to enrich our understanding of psilocybin's therapeutic  
379 mechanisms as we go forward.

## 380 References

- 381 Barrett, F. S., Doss, M. K., Sepeda, N. D., Pekar, J. J., & Griffiths, R. R. (2020). Emotions  
382 and brain function are altered up to one month after a single high dose of psilocybin.  
383 *Scientific Reports*, *10*(1), 1–14. <https://doi.org/10.1038/s41598-020-59282-y>
- 384 Barrett, F. S., Preller, K. H., & Kaelen, M. (2018). Psychedelics and music: neuroscience and  
385 therapeutic implications. *International Review of Psychiatry*, *30*(4), 350–362.  
386 <https://doi.org/10.1080/09540261.2018.1484342>
- 387 Bower, J., Magee, W. L., Catroppa, C., & Baker, F. A. (2021). The Neurophysiological  
388 Processing of Music in Children: A Systematic Review With Narrative Synthesis and  
389 Considerations for Clinical Practice in Music Therapy. *Frontiers in Psychology*,  
390 *12*(April), 1–19. <https://doi.org/10.3389/fpsyg.2021.615209>
- 391 Breakspear, M., & Chang, L. J. (2020). Movie viewing elicits rich and reliable brain state  
392 dynamics. *Nature Communications*, 1–14. <https://doi.org/10.1038/s41467-020-18717-w>
- 393 Brown, S., Gao, X., Tisdelle, L., Eickhoff, S. B., & Liotti, M. (2011). Naturalizing aesthetics:  
394 Brain areas for aesthetic appraisal across sensory modalities. *NeuroImage*, *58*(1), 250–  
395 258. <https://doi.org/10.1016/j.neuroimage.2011.06.012>
- 396 Cao, B., Zhu, J., Zuckerman, H., Rosenblat, J. D., Brietzke, E., Pan, Z., ... McIntyre, R. S.  
397 (2019). Pharmacological interventions targeting anhedonia in patients with major  
398 depressive disorder: A systematic review. *Progress in Neuro-Psychopharmacology and*  
399 *Biological Psychiatry*, *92*(December 2018), 109–117.  
400 <https://doi.org/10.1016/j.pnpbp.2019.01.002>
- 401 Carhart-Harris, R., Giribaldi, B., Watts, R., Baker-Jones, M., Murphy-Beiner, A., Murphy,  
402 R., ... Nutt, D. J. (2021). Trial of Psilocybin versus Escitalopram for Depression. *New*  
403 *England Journal of Medicine*, *384*(15), 1402–1411.  
404 <https://doi.org/10.1056/nejmoa2032994>
- 405 Carhart-Harris, R. L., Bolstridge, M., Rucker, J., Day, C. M. J., Erritzoe, D., Kaelen, M., ...  
406 Nutt, D. J. (2016). Psilocybin with psychological support for treatment-resistant  
407 depression: an open-label feasibility study. *The Lancet Psychiatry*, *3*(7), 619–627.  
408 [https://doi.org/10.1016/S2215-0366\(16\)30065-7](https://doi.org/10.1016/S2215-0366(16)30065-7)

- 409 Carhart-Harris, R. L., Erritzoe, D., Williams, T., Stone, J. M., Reed, L. J., Colasanti, A., ...  
410 Nutt, D. J. (2012). Neural correlates of the psychedelic state as determined by fMRI  
411 studies with psilocybin. *Proceedings of the National Academy of Sciences of the United*  
412 *States of America*, 109(6), 2138–2143. <https://doi.org/10.1073/pnas.1119598109>
- 413 Carhart-Harris, R. L., Kevin, M., Robert, L., David, E., Wall, M. B., Bart, F., ... Nutt, D. J.  
414 (2015). The Effects of Acutely Administered 3,4-Methylenedioxymethamphetamine on  
415 Spontaneous Brain Function in Healthy Volunteers Measured with Arterial Spin  
416 Labelling and Blood Oxygen Level-Dependent Resting-State Functional Connectivity.  
417 *Biological Psychiatry*, 78(8), 554–562. <https://doi.org/10.1016/j.biopsych.2013.12.015>
- 418 Carhart-Harris, R. L., Roseman, L., Bolstridge, M., Demetriou, L., Pannekoek, J. N., Wall,  
419 M. B., ... Nutt, D. J. (2017). Psilocybin for treatment-resistant depression: fMRI-  
420 measured brain mechanisms. *Scientific Reports*, 7(1), 13187.  
421 <https://doi.org/10.1038/s41598-017-13282-7>
- 422 Cong, F., Puoliväli, T., Alluri, V., Sipola, T., Burunat, I., Toiviainen, P., ... Ristaniemi, T.  
423 (2014). Key issues in decomposing fMRI during naturalistic and continuous music  
424 experience with independent component analysis. *Journal of Neuroscience Methods*,  
425 223, 74–84. <https://doi.org/10.1016/j.jneumeth.2013.11.025>
- 426 Cross, I. (2001). Music, Cognition, Culture, and Evolution. *Annals of the New York Academy*  
427 *of Sciences*, 930(1), 28–42.
- 428 Di Simplicio, M., Norbury, R., & Harmer, C. J. (2012). Short-term antidepressant  
429 administration reduces negative self-referential processing in the medial prefrontal  
430 cortex in subjects at risk for depression. *Molecular Psychiatry*, 17(5), 503–510.  
431 <https://doi.org/10.1038/mp.2011.16>
- 432 Dittrich, A. (1998). The standardized psychometric assessment of altered states of  
433 consciousness (ASCs) in humans. *Pharmacopsychiatry*, 31(SUPPL. 2), 80–84.  
434 <https://doi.org/10.1055/s-2007-979351>
- 435 Finn, E. S., & Bandettini, P. A. (2021). Movie-watching outperforms rest for functional  
436 connectivity-based prediction of behavior. *NeuroImage*, 235(March), 117963.  
437 <https://doi.org/10.1016/j.neuroimage.2021.117963>

- 438 Fitch, W. T. (2006). The biology and evolution of music: a comparative perspective.  
439 *Cognition*, 100(1), 173–215. <https://doi.org/10.1016/j.cognition.2005.11.009>
- 440 Friston, K. J., Rotshtein, P., Geng, J. J., Sterzer, P., & Henson, R. N. (2006). A critique of  
441 functional localisers. *NeuroImage*, 30(4), 1077–1087.  
442 <https://doi.org/10.1016/j.neuroimage.2005.08.012>
- 443 Godlewska, B. R., Browning, M., Norbury, R., Cowen, P. J., & Harmer, C. J. (2016). Early  
444 changes in emotional processing as a marker of clinical response to SSRI treatment in  
445 depression. *Translational Psychiatry*, 6(11), 1–7. <https://doi.org/10.1038/tp.2016.130>
- 446 Grob, C. S., Danforth, A. L., Chopra, G. S., Hagerty, M., McKay, C. R., Halberstad, A. L., &  
447 Greer, G. R. (2011). Pilot study of psilocybin treatment for anxiety in patients with  
448 advanced-stage cancer. *Archives of General Psychiatry*, 68(1), 71–78.  
449 <https://doi.org/10.1001/archgenpsychiatry.2010.116>
- 450 Hardy, K. (2021). Paleomedicine and the Evolutionary Context of Medicinal Plant Use.  
451 *Revista Brasileira de Farmacognosia*, 31(1), 1–15. [https://doi.org/10.1007/s43450-020-](https://doi.org/10.1007/s43450-020-00107-4)  
452 00107-4
- 453 Hasler, F., Grimberg, U., Benz, M. A., Huber, T., & Vollenweider, F. X. (2004). Acute  
454 psychological and physiological affects of psilocybin in healthy humans: A double-  
455 blind, placebo-controlled dose-effect study. *Psychopharmacology*, 172(2), 145–156.  
456 <https://doi.org/10.1007/s00213-003-1640-6>
- 457 Jenkins, L. M., Skerrett, K. A., DelDonno, S. R., Patrón, V. G., Meyers, K. K., Peltier, S., ...  
458 Starkman, M. N. (2018). Individuals with more severe depression fail to sustain nucleus  
459 accumbens activity to preferred music over time. *Psychiatry Research - Neuroimaging*,  
460 275(March), 21–27. <https://doi.org/10.1016/j.psychresns.2018.03.002>
- 461 Johnson, M. W., Garcia-Romeu, A., Cosimano, M. P., & Griffiths, R. R. (2014). Pilot study  
462 of the 5-HT<sub>2A</sub>R agonist psilocybin in the treatment of tobacco addiction. *Journal of*  
463 *Psychopharmacology*, 28(11), 983–992. <https://doi.org/10.1177/0269881114548296>
- 464 Kaelen, M., Barrett, F. S., Roseman, L., Lorenz, R., Family, N., Bolstridge, M., ... Carhart-  
465 Harris, R. L. (2015). LSD enhances the emotional response to music.  
466 *Psychopharmacology*, 232(19), 3607–3614. <https://doi.org/10.1007/s00213-015-4014-y>

- 467 Kaelen, Mendel, Lorenz, R., Barrett, F., Roseman, L., Orban, C., Santos-Ribeiro, A., ...  
468 Leech, R. (2017). Effects of LSD on music-evoked brain activity. *BioRxiv*.  
469 <https://doi.org/10.1101/153031>
- 470 Kaelen, Mendel, Roseman, L., Kahan, J., Santos-Ribeiro, A., Orban, C., Lorenz, R., ...  
471 Carhart-Harris, R. (2016). LSD modulates music-induced imagery via changes in  
472 parahippocampal connectivity. *European Neuropsychopharmacology*, (April).  
473 <https://doi.org/10.1016/j.euroneuro.2016.03.018>
- 474 Koelsch, S. (2020). A coordinate-based meta-analysis of music-evoked emotions.  
475 *NeuroImage*, 223(January), 117350. <https://doi.org/10.1016/j.neuroimage.2020.117350>
- 476 Koelsch, S., & Skouras, S. (2014). Functional centrality of amygdala, striatum and  
477 hypothalamus in a “small-world” network underlying joy: An fMRI study with music.  
478 *Human Brain Mapping*, 35(7), 3485–3498. <https://doi.org/10.1002/hbm.22416>
- 479 Koelsch, S., Skouras, S., & Lohmann, G. (2018). The auditory cortex hosts network nodes  
480 influential for emotion processing: An fMRI study on music-evoked fear and joy. *PLoS*  
481 *ONE*, 13(1), 1–22. <https://doi.org/10.1371/journal.pone.0190057>
- 482 Küblböck, M., Woletz, M., Höflich, A., Sladky, R., Kranz, G. S., Hoffmann, A., ...  
483 Windischberger, C. (2014). Stability of low-frequency fluctuation amplitudes in  
484 prolonged resting-state fMRI. *NeuroImage*, 103, 249–257.  
485 <https://doi.org/10.1016/j.neuroimage.2014.09.038>
- 486 Lemogne, C., Delaveau, P., Freton, M., Guionnet, S., & Fossati, P. (2012). Medial prefrontal  
487 cortex and the self in major depression. *Journal of Affective Disorders*.  
488 <https://doi.org/10.1016/j.jad.2010.11.034>
- 489 Lemogne, C., le Bastard, G., Mayberg, H., Volle, E., Bergouignan, L., Lehericy, S., ...  
490 Fossati, P. (2009). In search of the depressive self: Extended medial prefrontal network  
491 during self-referential processing in major depression. *Social Cognitive and Affective*  
492 *Neuroscience*, 4(3), 305–312. <https://doi.org/10.1093/scan/nsp008>
- 493 Li, Z., Kadivar, A., Pluta, J., Dunlop, J., & Wang, Z. (2012). Test-retest stability analysis of  
494 resting brain activity revealed by blood oxygen level-dependent functional MRI. *Journal*  
495 *of Magnetic Resonance Imaging*, 36(2), 344–354. <https://doi.org/10.1002/jmri.23670>

- 496 Ma, Y. (2015). Neuropsychological mechanism underlying antidepressant effect: A  
497 systematic meta-analysis. *Molecular Psychiatry*, 20(3), 311–319.  
498 <https://doi.org/10.1038/mp.2014.24>
- 499 Maguire, E. A. (2012). Studying the freely-behaving brain with fMRI. *NeuroImage*, 62(2),  
500 1170–1176. <https://doi.org/10.1016/j.neuroimage.2012.01.009>
- 501 Menon, V., & Levitin, D. J. (2005). The rewards of music listening: response and  
502 physiological connectivity of the mesolimbic system. *NeuroImage*, 28(1), 175–184.  
503 <https://doi.org/10.1016/j.neuroimage.2005.05.053>
- 504 Mertens, L. J., Wall, M. B., Roseman, L., Demetriou, L., Nutt, D. J., & Carhart-Harris, R. L.  
505 (2020). Therapeutic mechanisms of psilocybin: Changes in amygdala and prefrontal  
506 functional connectivity during emotional processing after psilocybin for treatment-  
507 resistant depression. *Journal of Psychopharmacology*, 1–14.  
508 <https://doi.org/10.1177/0269881119895520>
- 509 Nejad, A. B., Fossati, P., & Lemogne, C. (2013). Self-Referential Processing, Rumination,  
510 and Cortical Midline Structures in Major Depression. *Frontiers in Human Neuroscience*,  
511 7, 666. <https://doi.org/10.3389/fnhum.2013.00666>
- 512 Nilsson, U. (2008). The Anxiety- and Pain-Reducing Effects of Music Interventions: A  
513 Systematic Review. *AORN Journal*, 87(4). <https://doi.org/10.1016/j.aorn.2007.09.013>
- 514 Osuch, E. A., Bluhm, R. L., Williamson, P. C., Théberge, J., Densmore, M., & Neufeld, R.  
515 W. J. (2009). Brain activation to favorite music in healthy controls and depressed  
516 patients. *NeuroReport*, 20(13), 1204–1208.  
517 <https://doi.org/10.1097/WNR.0b013e32832f4da3>
- 518 Reybrouck, M., Vuust, P., & Brattico, E. (2018). Brain connectivity networks and the  
519 aesthetic experience of music. *Brain Sciences*, 8(6).  
520 <https://doi.org/10.3390/brainsci8060107>
- 521 Roseman, L., Demetriou, L., Wall, M. B., Nutt, D. J., & Carhart-Harris, R. L. (2018).  
522 Increased amygdala responses to emotional faces after psilocybin for treatment-resistant  
523 depression. *Neuropharmacology*. <https://doi.org/10.1016/j.neuropharm.2017.12.041>



- 524 Roseman, L., Haijen, E., Idialu-Ikato, K., Kaelen, M., Watts, R., & Carhart-Harris, R. (2019).  
525 Emotional breakthrough and psychedelics: Validation of the Emotional Breakthrough  
526 Inventory. *Journal of Psychopharmacology*, *33*(9), 1076–1087.  
527 <https://doi.org/10.1177/0269881119855974>
- 528 Rosenbaum, D., Int-Veen, I., Kroczek, A., Hilsendegen, P., Velten-Schurian, K., Bihlmaier,  
529 I., ... Ehlis, A. C. (2020). Amplitude of low frequency fluctuations (ALFF) of  
530 spontaneous and induced rumination in major depression: An fNIRS study. *Scientific*  
531 *Reports*, *10*(1), 1–13. <https://doi.org/10.1038/s41598-020-78317-y>
- 532 Rush, A. J., Trivedi, M. H., Ibrahim, H. M., Carmody, T. J., Arnow, B., Klein, D. N., ...  
533 Keller, M. B. (2003). The 16-item Quick Inventory of Depressive Symptomatology  
534 (QIDS), clinician rating (QIDS-C), and self-report (QIDS-SR): A psychometric  
535 evaluation in patients with chronic major depression. *Biological Psychiatry*, *54*(5), 573–  
536 583. [https://doi.org/10.1016/S0006-3223\(02\)01866-8](https://doi.org/10.1016/S0006-3223(02)01866-8)
- 537 Sonkusare, S., Breakspear, M., & Guo, C. (2019). Naturalistic Stimuli in Neuroscience:  
538 Critically Acclaimed. *Trends in Cognitive Sciences*, 1–16.  
539 <https://doi.org/10.1016/j.tics.2019.05.004>
- 540 Sundar, S. (2007). Traditional Healing System and Modern Music Therapy in India. *Music*  
541 *Therapy Today*, *8*(3), 397–407. Retrieved from  
542 [http://epgp.inflibnet.ac.in/epgpdata/uploads/epgp\\_content/S000825CR/P001532/M0184](http://epgp.inflibnet.ac.in/epgpdata/uploads/epgp_content/S000825CR/P001532/M018429/ET/1483519482Text.pdf)  
543 [29/ET/1483519482Text.pdf](http://epgp.inflibnet.ac.in/epgpdata/uploads/epgp_content/S000825CR/P001532/M018429/ET/1483519482Text.pdf)
- 544 Wang, J., Ren, Y., Hu, X., Nguyen, V. T., Guo, L., Han, J., & Guo, C. C. (2017). Test–retest  
545 reliability of functional connectivity networks during naturalistic fMRI paradigms.  
546 *Human Brain Mapping*, *38*(4), 2226–2241. <https://doi.org/10.1002/hbm.23517>
- 547 Wen, X., Wu, X., Liu, J., Li, K., & Yao, L. (2013). Abnormal Baseline Brain Activity in  
548 Non-Depressed Parkinson’s Disease and Depressed Parkinson’s Disease: A Resting-  
549 State Functional Magnetic Resonance Imaging Study. *PLoS ONE*, *8*(5), 1–8.  
550 <https://doi.org/10.1371/journal.pone.0063691>
- 551 Woletz, M., Hoffmann, A., Tik, M., Sladky, R., Lanzenberger, R., Robinson, S., &  
552 Windischberger, C. (2019). Beware detrending: Optimal preprocessing pipeline for low-



- 553 frequency fluctuation analysis. *Human Brain Mapping*, 40(5), 1571–1582.  
554 <https://doi.org/10.1002/hbm.24468>
- 555 Yang, L., Comninos, A. N., Dhillon, W. S., Yang, L., Demetriou, L., Wall, M. B., ... Dhillon,  
556 W. S. (2020). Kisspeptin enhances brain responses to olfactory and visual cues of  
557 attraction in men Find the latest version : Kisspeptin enhances brain responses to  
558 olfactory and visual cues of attraction in men. *JCI Insight*, 5(3).
- 559 Zang, Y. F., Yong, H., Chao-Zhe, Z., Qing-Jiu, C., Man-Qiu, S., Meng, L., ... Yu-Feng, W.  
560 (2007). Altered baseline brain activity in children with ADHD revealed by resting-state  
561 functional MRI. *Brain and Development*, 29(2), 83–91.  
562 <https://doi.org/10.1016/j.braindev.2006.07.002>
- 563 Zentner, M., Grandjean, D., & Scherer, K. R. (2008). Emotions Evoked by the Sound of  
564 Music: Characterization, Classification, and Measurement. *Emotion*, 8(4), 494–521.  
565 <https://doi.org/10.1037/1528-3542.8.4.494>
- 566 Zou, Q. H., Zhu, C. Z., Yang, Y., Zuo, X. N., Long, X. Y., Cao, Q. J., ... Zang, Y. F. (2008).  
567 An improved approach to detection of amplitude of low-frequency fluctuation (ALFF)  
568 for resting-state fMRI: Fractional ALFF. *Journal of Neuroscience Methods*, 172(1),  
569 137–141. <https://doi.org/10.1016/j.jneumeth.2008.04.012>
- 570 Zuo, X. N., & Xing, X. X. (2014). Test-retest reliabilities of resting-state FMRI  
571 measurements in human brain functional connectomics: A systems neuroscience  
572 perspective. *Neuroscience and Biobehavioral Reviews*, 45, 100–118.  
573 <https://doi.org/10.1016/j.neubiorev.2014.05.009>
- 574
- 575

576 **Supplementary Material**

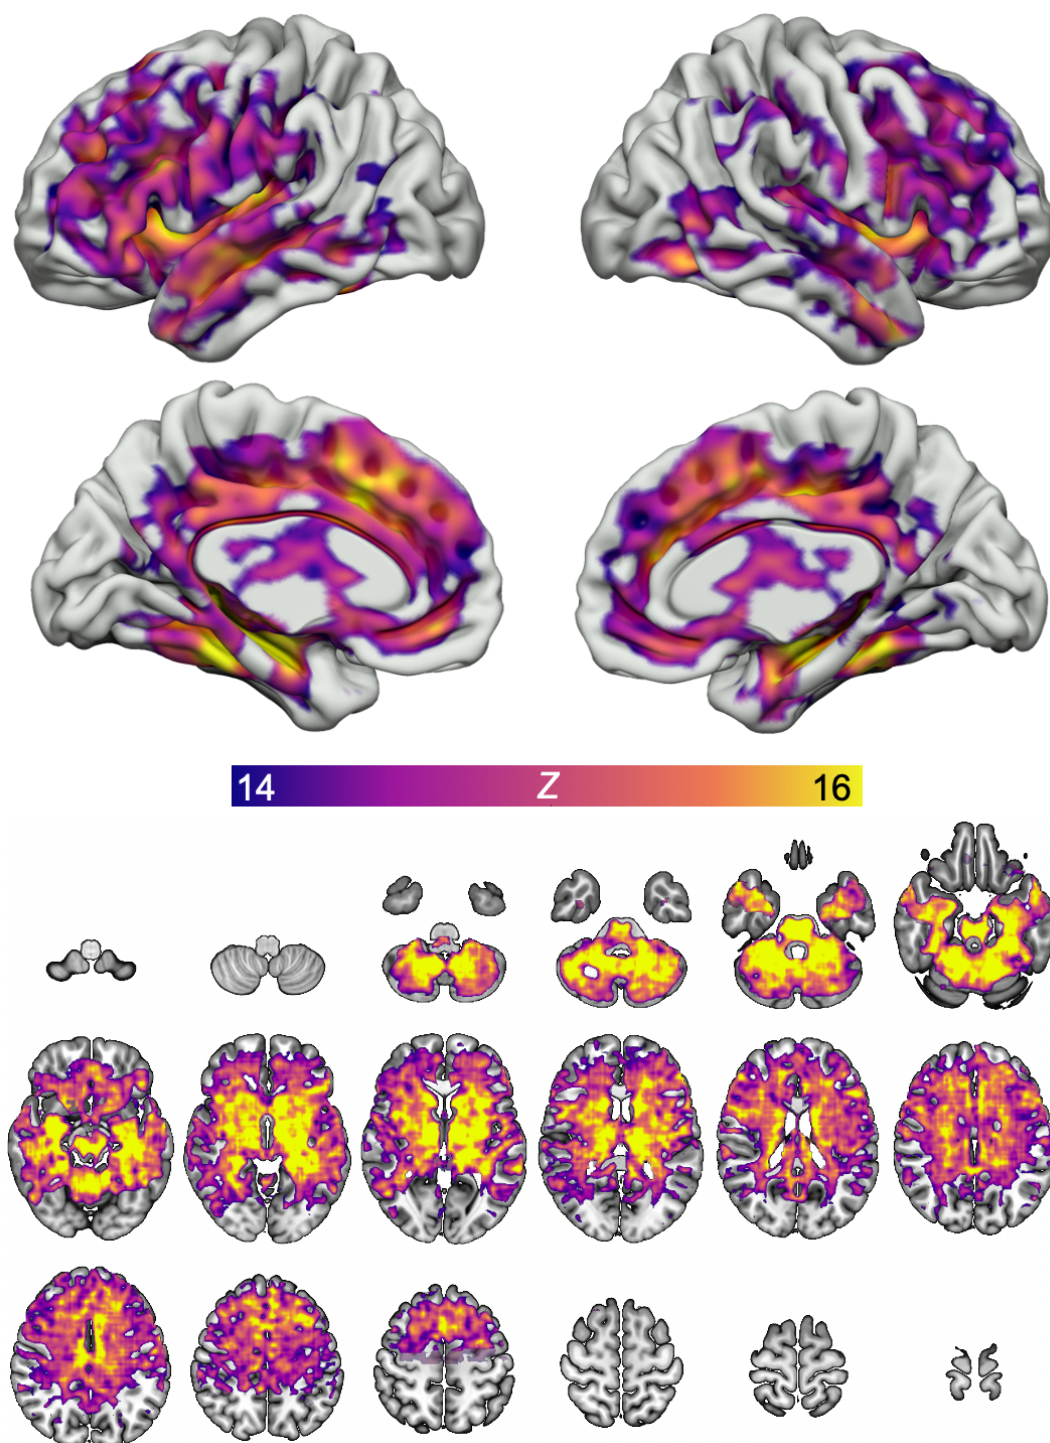

577

578 Figure S1. Mean ALFF values across all subjects (N=19), and all scans (four scans per  
579 subject; music-listening and resting-state scans, before and after therapy). All statistical maps  
580 are generated with cluster probability threshold of  $Z=2.3$ ,  $p<0.05$ , cluster-corrected for  
581 multiple comparisons. Images are shown in neurological orientation (left hemisphere = left of  
582 the image).

|                                | <b>Music <math>\Delta</math> (after - before)</b> |                 | <b>Rest <math>\Delta</math> (after - before)</b> |                 |
|--------------------------------|---------------------------------------------------|-----------------|--------------------------------------------------|-----------------|
|                                | Pearson's <i>r</i>                                | <i>p</i> -value | Pearson's <i>r</i>                               | <i>p</i> -value |
| <b>GEMS-3, Sublimity, Day2</b> | 0.145                                             | 0.565           | 0.141                                            | 0.577           |
| <b>GEMS-3, Vitality, Day 2</b> | 0.336                                             | 0.173           | 0.141                                            | 0.578           |
| <b>GEMS-3, Unease, Day 2</b>   | 0.079                                             | 0.754           | -0.069                                           | 0.786           |

583

584 Table S1. Correlations between the delta (after treatment – before treatment) of ALFF  
 585 measures in ROIs and the GEMS-3 scale on day 2 (high-dose treatment day). All correlations  
 586 were non-significant (all *p* values > 0.17).

587

|                       | <b>Music <math>\Delta</math> (after - before)</b> |                 | <b>Rest <math>\Delta</math> (after - before)</b> |                 |
|-----------------------|---------------------------------------------------|-----------------|--------------------------------------------------|-----------------|
|                       | Pearson's <i>r</i>                                | <i>p</i> -value | Pearson's <i>r</i>                               | <i>p</i> -value |
| <b>QIDS: Baseline</b> | -0.209                                            | 0.391           | -0.005                                           | 0.984           |
| <b>QIDS: 1 Week</b>   | -0.108                                            | 0.659           | -0.068                                           | 0.781           |
| <b>QIDS: 2 Weeks</b>  | -0.06                                             | 0.807           | 0.058                                            | 0.812           |
| <b>QIDS: 3 Weeks</b>  | -0.077                                            | 0.753           | -0.083                                           | 0.737           |
| <b>QIDS: 5 Weeks</b>  | 0.009                                             | 0.97            | -0.012                                           | 0.962           |
| <b>QIDS: 3 Months</b> | 0.252                                             | 0.298           | 0.28                                             | 0.246           |
| <b>QIDS: 6 Months</b> | 0.009                                             | 0.971           | -0.026                                           | 0.915           |

588

589 Table S2. Correlations between the delta (after treatment – before treatment) of ALFF  
 590 measures in ROIs and the Quick Inventory of Depression Symptoms scale at time-points  
 591 ranging from baseline (start of the study) to the six-month follow-up. All correlations were  
 592 non-significant (all *p* values > ~0.3).

593

|                      | Music $\Delta$ (after - before) |                 | Rest $\Delta$ (after - before) |                 |
|----------------------|---------------------------------|-----------------|--------------------------------|-----------------|
|                      | Pearson's <i>r</i>              | <i>p</i> -value | Pearson's <i>r</i>             | <i>p</i> -value |
| <b>5D-ASC: OCEAN</b> | 0.294                           | 0.222           | 0.201                          | 0.41            |
| <b>5D-ASC: DED</b>   | 0.49                            | <b>0.033</b>    | 0.336                          | 0.16            |
| <b>5D-ASC: VRS</b>   | 0.557                           | <b>0.013</b>    | 0.407                          | 0.084           |
| <b>5D-ASC: AUA</b>   | 0.545                           | <b>0.016</b>    | 0.307                          | 0.2             |
| <b>5D-ASC: VIR</b>   | 0.613                           | <b>0.005</b>    | 0.406                          | 0.084           |
| <b>5D-ASC: Mean</b>  | 0.621                           | <b>0.005</b>    | 0.411                          | 0.08            |

594

595 Table S3. Correlations between the delta (after treatment – before treatment) of ALFF  
596 measures in ROIs and the 5-dimensional altered states of consciousness (5D-ASC) scale  
597 acquired during the second (high-dose) dosing visit. OCEAN = “Oceanic boundlessness”;  
598 DED = “Ego-dissolution”; VRS = “Visionary restructuralization”; AUA = “Auditory  
599 alterations”; VIR = “Vigilance reduction”. MEAN = Mean of all five sub-scales. Significant  
600 correlations ( $p < 0.05$ ) are highlighted with bold text. The VIR and mean result survive a  
601 family-wise corrected  $p$  value threshold of 0.008.

602
